# Supplementary material for: Slow Release and Water Retention Performance of Poly(acrylic acid-co-acrylamide)/Fulvic Acid/Oil Shale Semicoke Superabsorbent Composites
Source: MDPI journal article supplement (doi:10.3390/polym14091719), 2022-04-22
Supplement: s1 [file s1]

**Slow release and water retention performance of poly(acrylic acid-co-acrylamide)/fulvic acid/oil shale semicoke superabsorbent composites**

Yongsheng Wang <sup>1,2</sup>, Yongfeng Zhu <sup>1,\*</sup>, Yan Liu <sup>1</sup>, Bin Mu <sup>1</sup>, Aiqin Wang <sup>1,\*</sup>

<sup>1</sup> *Key Laboratory of Clay Mineral Applied Research of Gansu Province, Center of Eco-material and Green Chemistry, Lanzhou Institute of Chemical Physics, Chinese Academy of Sciences, Lanzhou 730000, P.R. China*

<sup>2</sup> *Center of Materials Science and Optoelectronics Engineering, University of Chinese Academy of Sciences, Beijing 100049, P.R. China*

---

\*Correspondence to: Aiqin Wang (E-mail: aqwang@licp.cas.cn), Tel: +86-931 4968118, Fax: +86-931 4968019.

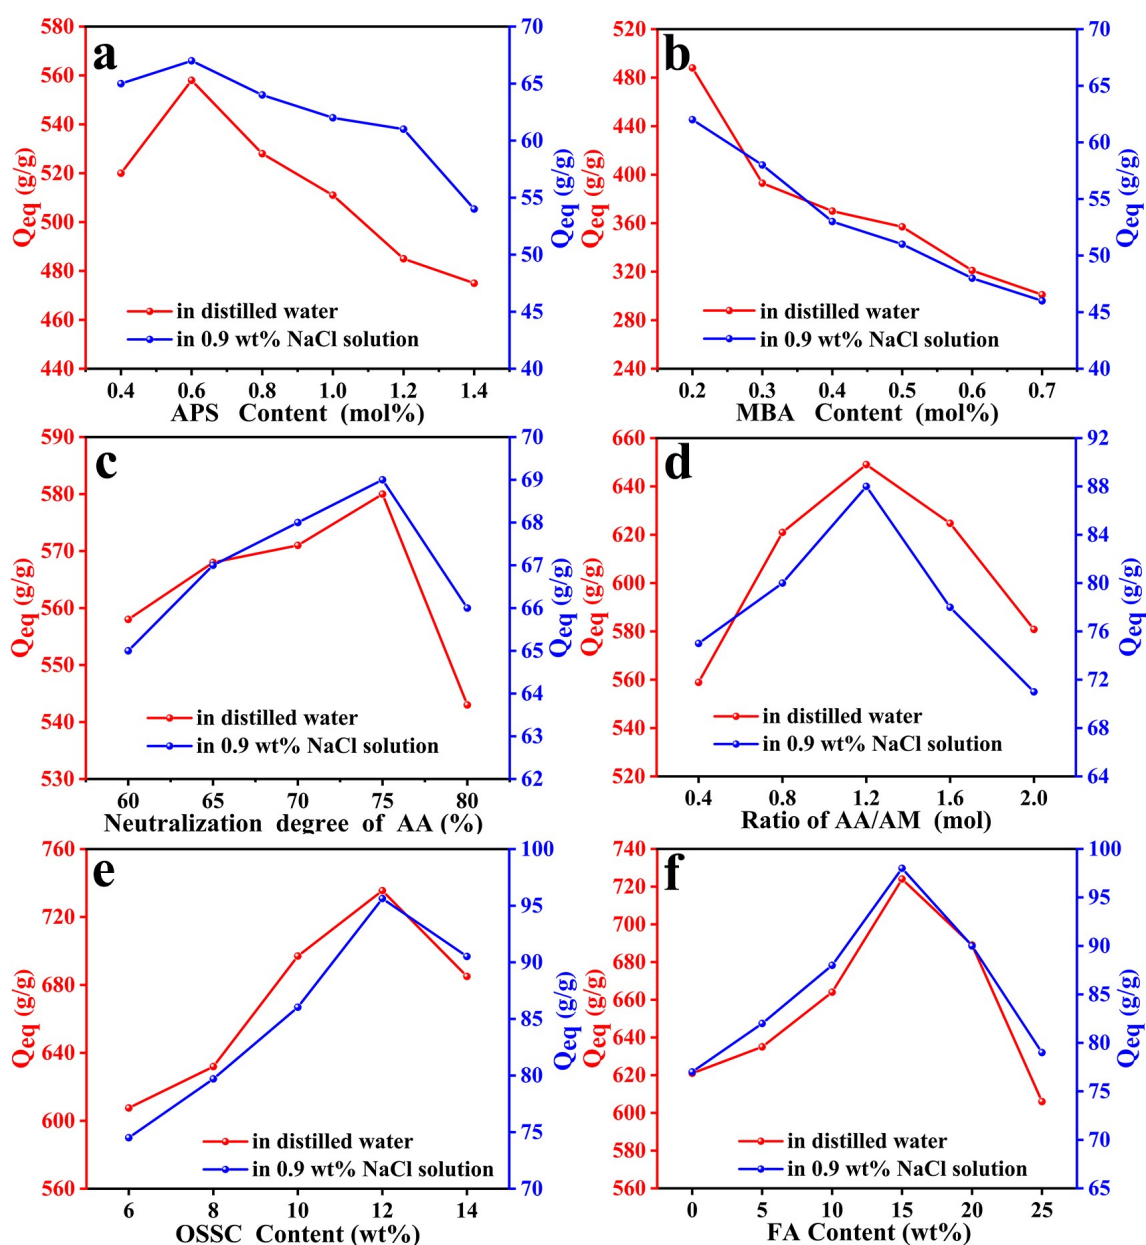

**Figure S1.** The effects of synthesis conditions on water (salt) absorbency of PAMFS: Effect of APS content (a), MBA content (b), the neutralization degree of AA (c), the ratio of AA/AM (d), OSSC content (e) and FA content (f).

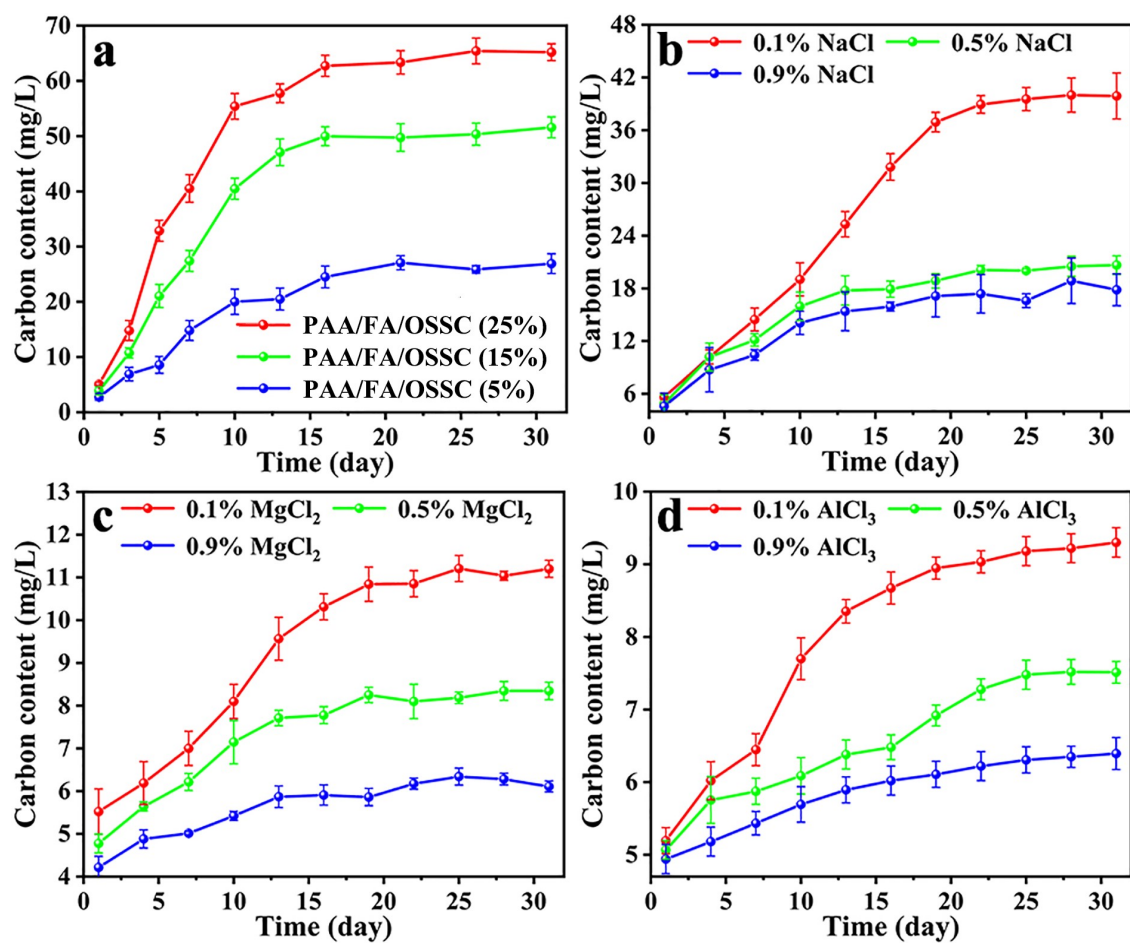

**Figure S2.** FA slow release of PAA/FA/OSSC in distilled water (a); FA slow release of PAA/FA/SC (15%) in NaCl salt solution (b), MgCl<sub>2</sub> salt solution (c), and AlCl<sub>3</sub> salt solution (d).

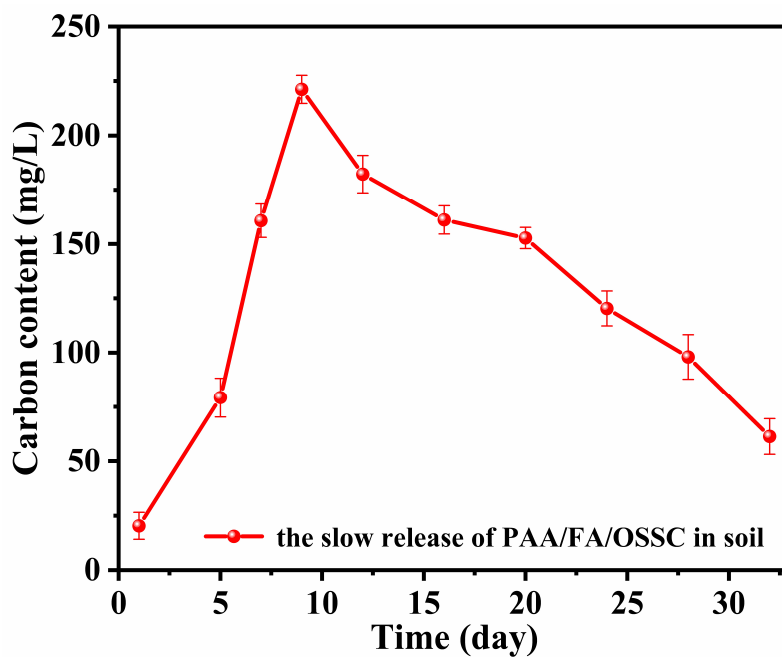

**Figure S3.** The slow release of PAA/FA/OSSC in soil.

**Table S1.** Comparing with the references on slow-release fertilizers including NPK and HA in recent years

| Slow-release material            | Swelling capacity  |                          | Time for maximum sustained release |         | References       |
|----------------------------------|--------------------|--------------------------|------------------------------------|---------|------------------|
|                                  | in distilled water | in 0.9 wt% NaCl solution | accumulation                       |         |                  |
|                                  |                    |                          | in distilled water                 | in soil |                  |
| P(AA-co-AM)/FA/SC                | 724 g/g            | 98 g/g                   | 16 d                               | 20 d    | Current research |
| PAA/HA/SC                        | 824 g/g            | 80 g/g                   | 15 d                               | 9 d     | [7]              |
| MOF                              | 37 g/g             | --                       | 10 h                               | --      | [8]              |
| MIL-100(Fe)@CNFs                 |                    |                          |                                    |         |                  |
| SDB-pellet                       | --                 | --                       | 10 d                               | 20 d    | [9]              |
| NPK/CS-GI-K                      | 90 g/g             | --                       | 20 d                               | --      | [10]             |
| CSt-g-PAA/NR/PVA                 | 321 g/g            | 57 g/g                   | 60 h                               | 20 d    | [11]             |
| Slow-release fertilizers (WSF)   | 178 g/g            | 48 g/g                   | 6 h                                | 5 d     | [12]             |
| Starch-based                     | 253 g/g            | 57 g/g                   | 20 d                               | --      | [13]             |
| superabsorbent polymers (SBSAPs) |                    |                          |                                    |         |                  |
| Wheat nano-biochar (WBNC)        | 98 g/g             | --                       | 10 d                               | 18 d    | [14]             |
| PAA/AMPS/CTS/SH                  | 998 g/g            | 101 g/g                  | 10 d                               | --      | [15]             |
| SBS-g-P(AA/AM)-UF                | 109 g/g            | 43 g/g                   | --                                 | 10 d    | [16]             |
| CSGCHs                           | 298 g/g            | 47 g/g                   | 120 h                              | --      | [17]             |

**Table S2.** The swelling kinetic parameters of PAMFS and PAMS in distilled water or 0.9 wt% NaCl solution.

| Samples | The swelling kinetic parameters |                             |        |                       |                             |        |
|---------|---------------------------------|-----------------------------|--------|-----------------------|-----------------------------|--------|
|         | in distilled water              |                             |        | in 0.9% NaCl solution |                             |        |
|         | $Q_{\infty}$                    | $K_s$                       | n      | $Q_{\infty}$          | $K_s$                       | n      |
|         | (g/g)                           | ( $\times 10^{-5}$ , g/g·s) |        | (g/g)                 | ( $\times 10^{-5}$ , g/g·s) |        |
| PAMFS   | 729.93                          | 0.4066                      | 0.4679 | 105.93                | 2.9814                      | 0.4024 |
| PAMS    | 632.91                          | 0.2958                      | 0.5214 | 75.36                 | 3.1573                      | 0.4217 |
